# Supplementary material for: Modulation of the Erwinia ligand-gated ion channel (ELIC) and the 5-HT3 receptor via a common vestibule site
Source: eLife. 2020 Jan 28;9:e51511. doi: 10.7554/eLife.51511 (PMC7015668; doi:10.7554/eLife.51511)
Supplement: Figure 1—figure supplement 1—source data 1. [file elife-51511-fig1-figsupp1-data1.xlsx]

## Sheet: Figure1supplement1-source data1
CONTROL GABA, no nanobody											30 microM PAM-NB										5 microM NAM-NB
CONTROL 1											GABA with PAM-Nb										GABA with NAM-Nb
Message		Concentrations	0	5	10	20	40				Message		Concentrations	0	5	10	20	40	40		Message		Concentrations	0	5	10	20	40	40
RNA Elic WT 0.1ug/ul 15nl/oocyte 3-Dec-2019	/VicData-X-06-Dec-2019/1-06-Dec-2019.vic	C- 5	0.0126	0.736	4.28	11.7	17.6				RNA Elic WT 0.1ug/ul 15nl/oocyte 3-Dec-2019	/VicData-X-05-Dec-2019/1-05-Dec-2019.vic	A- 5	0.00165	0.118	0.459	1.19	1.59	1.94		RNA Elic WT 0.1ug/ul 15nl/oocyte 26-Nov-2019	/VicData-X-02-Dec-2019/1-02-Dec-2019.vic	E- 8	0.00403	0.027	0.361	0.504	0.852	0.321
RNA Elic WT 0.1ug/ul 15nl/oocyte 3-Dec-2019	/VicData-X-06-Dec-2019/1-06-Dec-2019.vic	C-10	0.0121	0.228	1.38	5.19	9.52				RNA Elic WT 0.1ug/ul 15nl/oocyte 3-Dec-2019	/VicData-X-05-Dec-2019/1-05-Dec-2019.vic	A- 7	0.000785	0.534	2.1	6.89	9.84	14.3		RNA Elic WT 0.1ug/ul 15nl/oocyte 26-Nov-2019	/VicData-X-02-Dec-2019/1-02-Dec-2019.vic	E- 9	0.000449	0.0169	0.132	0.378	0.991	0.349
RNA Elic WT 0.1ug/ul 15nl/oocyte 3-Dec-2019	/VicData-X-06-Dec-2019/1-06-Dec-2019.vic	C-11	0.0272	0.0704	0.531	1.41	2.63				RNA Elic WT 0.1ug/ul 15nl/oocyte 3-Dec-2019	/VicData-X-05-Dec-2019/1-05-Dec-2019.vic	A-10	0.00166	0.755	2.46	7.42	13.3	15.2		RNA Elic WT 0.1ug/ul 15nl/oocyte 26-Nov-2019	/VicData-X-02-Dec-2019/1-02-Dec-2019.vic	F- 3	0.000568	0.0611	0.598	1.04	2.01	0.892
		Average	0.0173	0.345	2.06	6.11	9.92						Average	0.00137	0.469	1.67	5.16	8.23	10.5		RNA Elic WT 0.1ug/ul 15nl/oocyte 26-Nov-2019	/VicData-X-02-Dec-2019/1-02-Dec-2019.vic	F- 4	0.0055	0.0564	0.525	1.19	2.42	1.37
		SEM	0.00495	0.201	1.14	3.01	4.33						SEM	0.00029	0.187	0.615	1.99	3.47	4.28		RNA Elic WT 0.1ug/ul 15nl/oocyte 26-Nov-2019	/VicData-X-02-Dec-2019/1-02-Dec-2019.vic	F- 8	0.00211	0.0475	0.42	0.961	2.11	1.11
																							Average	0.00253	0.0418	0.407	0.813	1.68	0.808
Message		Concentrations	0.05	5	10	20	40				Message		Concentrations	0.05	5	10	20	40	40				SEM	0.000985	0.00854	0.0802	0.158	0.316	0.207
RNA Elic WT 0.1ug/ul 15nl/oocyte 3-Dec-2019	/VicData-X-06-Dec-2019/1-06-Dec-2019.vic	C- 5	0.000715	0.0418	0.243	0.665	1				RNA Elic WT 0.1ug/ul 15nl/oocyte 3-Dec-2019	/VicData-X-05-Dec-2019/1-05-Dec-2019.vic	A- 5	0.00104	0.0741	0.289	0.748	1	1.23
RNA Elic WT 0.1ug/ul 15nl/oocyte 3-Dec-2019	/VicData-X-06-Dec-2019/1-06-Dec-2019.vic	C-10	0.00127	0.0239	0.145	0.545	1				RNA Elic WT 0.1ug/ul 15nl/oocyte 3-Dec-2019	/VicData-X-05-Dec-2019/1-05-Dec-2019.vic	A- 7	7.98e-05	0.0543	0.213	0.7	1	1.45		Message		Concentrations	0.05	5	10	20	40	40
RNA Elic WT 0.1ug/ul 15nl/oocyte 3-Dec-2019	/VicData-X-06-Dec-2019/1-06-Dec-2019.vic	C-11	0.0104	0.0268	0.202	0.539	1				RNA Elic WT 0.1ug/ul 15nl/oocyte 3-Dec-2019	/VicData-X-05-Dec-2019/1-05-Dec-2019.vic	A-10	0.000125	0.0569	0.185	0.559	1	1.15		RNA Elic WT 0.1ug/ul 15nl/oocyte 26-Nov-2019	/VicData-X-02-Dec-2019/1-02-Dec-2019.vic	E- 8	0.00473	0.0317	0.423	0.591	1	0.377
		Average	0.00412	0.0309	0.197	0.583	1						Average	0.000414	0.0618	0.229	0.669	1	1.27		RNA Elic WT 0.1ug/ul 15nl/oocyte 26-Nov-2019	/VicData-X-02-Dec-2019/1-02-Dec-2019.vic	E- 9	0.000453	0.017	0.133	0.382	1	0.353
		SEM	0.00313	0.00553	0.0286	0.0412	0						SEM	0.000312	0.00623	0.0311	0.0566	0	0.0912		RNA Elic WT 0.1ug/ul 15nl/oocyte 26-Nov-2019	/VicData-X-02-Dec-2019/1-02-Dec-2019.vic	F- 3	0.000283	0.0304	0.298	0.516	1	0.444
																					RNA Elic WT 0.1ug/ul 15nl/oocyte 26-Nov-2019	/VicData-X-02-Dec-2019/1-02-Dec-2019.vic	F- 4	0.00227	0.0233	0.217	0.491	1	0.564
CONTROL 2											GABA alone										RNA Elic WT 0.1ug/ul 15nl/oocyte 26-Nov-2019	/VicData-X-02-Dec-2019/1-02-Dec-2019.vic	F- 8	0.001	0.0226	0.199	0.457	1	0.528
Message		Concentrations	0	5	10	20	40	40			Message		Concentrations	0	5	10	20	40					Average	0.00175	0.025	0.254	0.487	1	0.453
RNA Elic WT 0.1ug/ul 15nl/oocyte 3-Dec-2019	/VicData-X-06-Dec-2019/1-06-Dec-2019.vic	C- 5	0.00613	0.496	3.03	8.05	17.6	17.7			RNA Elic WT 0.1ug/ul 15nl/oocyte 3-Dec-2019	/VicData-X-05-Dec-2019/1-05-Dec-2019.vic	A- 5	0.00604	0.0355	0.26	0.773	1.59					SEM	0.000823	0.0027	0.0497	0.0344	0	0.0413
RNA Elic WT 0.1ug/ul 15nl/oocyte 3-Dec-2019	/VicData-X-06-Dec-2019/1-06-Dec-2019.vic	C-10	0.00569	0.23	1.42	3.43	9.52	7.67			RNA Elic WT 0.1ug/ul 15nl/oocyte 3-Dec-2019	/VicData-X-05-Dec-2019/1-05-Dec-2019.vic	A- 7	0.00354	0.277	1.28	4.16	9.84
RNA Elic WT 0.1ug/ul 15nl/oocyte 3-Dec-2019	/VicData-X-06-Dec-2019/1-06-Dec-2019.vic	C-11	0.0124	0.0714	0.447	1.1	2.63	2.42			RNA Elic WT 0.1ug/ul 15nl/oocyte 3-Dec-2019	/VicData-X-05-Dec-2019/1-05-Dec-2019.vic	A-10	0.0148	0.464	1.81	5.36	13.3			GABA alone
		Average	0.00807	0.266	1.63	4.19	9.92	9.25					Average	0.00812	0.259	1.12	3.43	8.23			Message		Concentrations	0	5	10	20	40
		SEM	0.00217	0.124	0.754	2.04	4.33	4.47					SEM	0.00341	0.124	0.456	1.37	3.47			RNA Elic WT 0.1ug/ul 15nl/oocyte 26-Nov-2019	/VicData-X-02-Dec-2019/1-02-Dec-2019.vic	E- 8	0.00302	0.131	0.825	0.908	0.852
																					RNA Elic WT 0.1ug/ul 15nl/oocyte 26-Nov-2019	/VicData-X-02-Dec-2019/1-02-Dec-2019.vic	E- 9	0.00931	0.128	0.802	1.09	0.991
Message		Concentrations	0.05	5	10	20	40	40			Message		Concentrations	0.05	5	10	20	40			RNA Elic WT 0.1ug/ul 15nl/oocyte 26-Nov-2019	/VicData-X-02-Dec-2019/1-02-Dec-2019.vic	F- 3	0.00149	0.263	1.55	2.35	2.01
RNA Elic WT 0.1ug/ul 15nl/oocyte 3-Dec-2019	/VicData-X-06-Dec-2019/1-06-Dec-2019.vic	C- 5	0.000348	0.0281	0.172	0.457	1	1			RNA Elic WT 0.1ug/ul 15nl/oocyte 3-Dec-2019	/VicData-X-05-Dec-2019/1-05-Dec-2019.vic	A- 5	0.00381	0.0224	0.164	0.488	1			RNA Elic WT 0.1ug/ul 15nl/oocyte 26-Nov-2019	/VicData-X-02-Dec-2019/1-02-Dec-2019.vic	F- 4	0.00588	0.185	1.24	2.47	2.42
RNA Elic WT 0.1ug/ul 15nl/oocyte 3-Dec-2019	/VicData-X-06-Dec-2019/1-06-Dec-2019.vic	C-10	0.000598	0.0241	0.149	0.36	1	0.805			RNA Elic WT 0.1ug/ul 15nl/oocyte 3-Dec-2019	/VicData-X-05-Dec-2019/1-05-Dec-2019.vic	A- 7	0.00036	0.0281	0.131	0.422	1			RNA Elic WT 0.1ug/ul 15nl/oocyte 26-Nov-2019	/VicData-X-02-Dec-2019/1-02-Dec-2019.vic	F- 8	0.00615	0.194	1.16	2.06	2.11
RNA Elic WT 0.1ug/ul 15nl/oocyte 3-Dec-2019	/VicData-X-06-Dec-2019/1-06-Dec-2019.vic	C-11	0.00472	0.0272	0.17	0.418	1	0.923			RNA Elic WT 0.1ug/ul 15nl/oocyte 3-Dec-2019	/VicData-X-05-Dec-2019/1-05-Dec-2019.vic	A-10	0.00111	0.0349	0.136	0.404	1					Average	0.00517	0.18	1.11	1.78	1.68
		Average	0.00189	0.0265	0.164	0.412	1	0.91					Average	0.00176	0.0285	0.144	0.438	1					SEM	0.00136	0.0247	0.139	0.325	0.316
		SEM	0.00142	0.00122	0.00748	0.0282	0	0.0573					SEM	0.00105	0.00362	0.0103	0.0254	0
																					Message		Concentrations	0.05	5	10	20	40
																					RNA Elic WT 0.1ug/ul 15nl/oocyte 26-Nov-2019	/VicData-X-02-Dec-2019/1-02-Dec-2019.vic	E- 8	0.00354	0.154	0.968	1.07	1
																					RNA Elic WT 0.1ug/ul 15nl/oocyte 26-Nov-2019	/VicData-X-02-Dec-2019/1-02-Dec-2019.vic	E- 9	0.00939	0.129	0.81	1.1	1
																					RNA Elic WT 0.1ug/ul 15nl/oocyte 26-Nov-2019	/VicData-X-02-Dec-2019/1-02-Dec-2019.vic	F- 3	0.000742	0.131	0.77	1.17	1
																					RNA Elic WT 0.1ug/ul 15nl/oocyte 26-Nov-2019	/VicData-X-02-Dec-2019/1-02-Dec-2019.vic	F- 4	0.00243	0.0766	0.513	1.02	1
																					RNA Elic WT 0.1ug/ul 15nl/oocyte 26-Nov-2019	/VicData-X-02-Dec-2019/1-02-Dec-2019.vic	F- 8	0.00292	0.0921	0.55	0.976	1
																							Average	0.00381	0.117	0.722	1.07	1
																							SEM	0.00147	0.0141	0.0848	0.0329	0
