# Supplementary material for: Modulation of the Erwinia ligand-gated ion channel (ELIC) and the 5-HT3 receptor via a common vestibule site
Source: eLife. 2020 Jan 28;9:e51511. doi: 10.7554/eLife.51511 (PMC7015668; doi:10.7554/eLife.51511)
Supplement: Figure 1—source data 1. [file elife-51511-fig1-data1.xlsx]

## Sheet: Figure1-source data 1
PAM-Nb recordings									NAM-Nb recordings
Concentrations	0	1	3	10	30				Concentrations	0	0.03	0.1	0.3	1	3
F- 2	0.24	0.33	0.43	0.53	0.59				C- 1	0.116	0.114	0.107	0.0813	0.0857	0.0909
F- 3	0.22	0.31	0.41	0.51	0.6				C- 2	0.244	0.239	0.243	0.169	0.175	0.177
F- 4	0.28	0.33	0.47	0.62	0.69				C- 3	0.704	0.708	0.725	0.535	0.535	0.526
F- 5	0.38	0.45	0.58	0.71	0.78				C- 4	0.0833	0.0763	0.0766	0.0539	0.0537	0.0491
F- 6	0.84	0.86	1.08	1.35	1.52				C- 5	0.0703	0.0686	0.065	0.0434	0.0388	0.0368
F- 7	0.28	0.34	0.49	0.65	0.76				C- 7	0.0855	0.0833	0.0817	0.0548	0.0492	0.0482
F- 8	0.21	0.25	0.37	0.5	0.58				Average (μA)	0.217	0.215	0.216	0.156	0.156	0.155
F-10	0.21	0.24	0.34	0.49	0.55				SEM	0.101	0.102	0.105	0.078	0.0784	0.0772
Average (μA)	0.33	0.39	0.52	0.67	0.76
SEM	0.08	0.07	0.08	0.1	0.11				Normalized
									C- 1	1	0.983	0.923	0.7	0.738	0.783
Normalized									C- 2	1	0.98	0.996	0.693	0.716	0.726
F- 2	1	1.38	1.82	2.24	2.47				C- 3	0.97	0.976	1	0.737	0.737	0.725
F- 3	1	1.39	1.84	2.3	2.71				C- 4	1	0.916	0.92	0.647	0.645	0.59
F- 4	1	1.19	1.7	2.22	2.48				C- 5	1	0.976	0.924	0.617	0.551	0.523
F- 5	1	1.18	1.52	1.85	2.04				C- 7	1	0.974	0.955	0.641	0.576	0.563
F- 6	1	1.03	1.29	1.61	1.81				Average	0.995	0.968	0.953	0.673	0.661	0.652
F- 7	1	1.19	1.71	2.28	2.68				SEM	0.00502	0.0104	0.0152	0.0183	0.0338	0.0434
F- 8	1	1.15	1.72	2.32	2.72
F-10	1	1.14	1.61	2.34	2.61
Average	1	1.21	1.65	2.14	2.44
SEM	0	0.04	0.06	0.09	0.12
