# Supplementary material for: Modulation of the Erwinia ligand-gated ion channel (ELIC) and the 5-HT3 receptor via a common vestibule site
Source: eLife. 2020 Jan 28;9:e51511. doi: 10.7554/eLife.51511 (PMC7015668; doi:10.7554/eLife.51511)
Supplement: Figure 2—figure supplement 1—source data 1. [file elife-51511-fig2-figsupp1-data1.xlsx]

## Sheet: Fig.2-fig.suppl.1-source data
ELIC	+ PAM-Nb (pdb #6ssi)	a7-AChBP	+ CU2017 (pdb #5oui)
D13	I33, Q50
		L33	bromo group
Q42	A99
R141	I33, Q50, T52
F142	N32
S143	N32, I33, G98
D144	F30, G98
I145	F29, F30
Q146	Q1, V2, R27, N28	E158	piperidine group
V147	N28	A159	carboxamide N + pyridine N
Y148	Q1	D160	pyridine N
		I161	pyridine group
G164	N28
K165	N28
A166	N28	V175	pyridine group + carboxamide O
		T176	pyridine + carboxamide O
T168	F29, F30	Q177	carboxamide N + piperidine group
H169	F30
I170	F30
		F196	pyridine group
		V198	bromo group
