# Supplementary material for: Modulation of the Erwinia ligand-gated ion channel (ELIC) and the 5-HT3 receptor via a common vestibule site
Source: eLife. 2020 Jan 28;9:e51511. doi: 10.7554/eLife.51511 (PMC7015668; doi:10.7554/eLife.51511)
Supplement: Figure 2—figure supplement 2—source data 1. [file elife-51511-fig2-figsupp2-data1.xlsx]

## Sheet: Fig.2-fig.suppl.2-source data
ELIC	+ NAM-Nb (pdb #6ssp)	ELIC	+ flurazepam (pdb #2yoe)
		I39	chloro group
R48	I109
K49	I109, R111
R65	D103, D103
W66	I106, I109, L110
I67	Y114
N68	D101, Y114, P115
N69	S112, D101, D103
	A102, I106, L110, S112, Y114, P115
G70	Y114
L71	L110
		P74 (+)-subunit	chlorophenyl group
		A75 (+)-subunit	chlorophenyl group
		L76 (+)-subunit	chlorophenyl group
		S84 (+)-subunit	diethylamino group
		T87 (+)-subunit	1,4-benzodiazepinone group
		T87 (-)-su­bunit	diethylamino group
		G88 (-)-subunit	diethylamino group
		N89 (-)-subunit	diethylamino group
		Y102 (+)-subunit	1,4-benzodiazepinone group + fluorophenyl group
