# Supplementary material for: Modulation of the Erwinia ligand-gated ion channel (ELIC) and the 5-HT3 receptor via a common vestibule site
Source: eLife. 2020 Jan 28;9:e51511. doi: 10.7554/eLife.51511 (PMC7015668; doi:10.7554/eLife.51511)
Supplement: Figure 2—source data 1. [file elife-51511-fig2-data1.xlsx]

## Sheet: Figure2-source data 1
PAM-Nb			NAM-Nb			2VL0			3EAM			6PV7
Radius (A)	Distance along pore (nm)		Radius (A)	Distance along pore (nm)		Radius (A)	Distance along pore (nm)		Radius (A)	Distance along pore (nm)		Radius (A)	Distance along pore (nm)
19.7381	-0.852719		19.9523	-0.955766		19.8645	-1.20684		19.5692	-1.61293		19.4798	-6.54128
19.2965	-0.802717		19.514	-0.905548		19.5039	-1.15683		19.2458	-1.56293		19.0243	-6.49109
18.8575	-0.752715		19.0778	-0.85533		19.1489	-1.10682		18.9286	-1.51293		18.5711	-6.4409
18.4219	-0.702711		18.6304	-0.80533		18.8009	-1.0568		18.6189	-1.46293		18.1204	-6.39072
17.9892	-0.652708		18.1853	-0.75533		18.4592	-1.00678		18.3167	-1.41293		17.6721	-6.34054
17.5601	-0.602707		17.743	-0.70533		18.1233	-0.956769		18.024	-1.36292		17.226	-6.29037
17.1336	-0.552706		17.3027	-0.65533		17.7941	-0.906754		17.7397	-1.31292		16.7828	-6.2402
16.7106	-0.502706		16.8663	-0.605329		17.4726	-0.856738		17.464	-1.26291		16.3435	-6.19
16.2913	-0.452706		16.4321	-0.555327		17.1588	-0.806722		17.1974	-1.21291		15.9073	-6.13979
15.8769	-0.402706		16.002	-0.505327		16.8538	-0.756712		16.9399	-1.16291		15.4748	-6.08962
15.467	-0.352706		15.5755	-0.455327		16.5567	-0.706702		16.6923	-1.11291		15.0462	-6.03944
15.049	-0.302535		15.1529	-0.405325		16.2692	-0.656689		16.4556	-1.06291		14.6208	-5.98924
14.6356	-0.252363		14.7341	-0.355323		15.9905	-0.606675		16.2296	-1.01291		14.1998	-5.93905
14.2094	-0.202273		14.3218	-0.305321		15.7214	-0.556666		16.0152	-0.962904		13.7848	-5.88887
13.786	-0.152183		13.9127	-0.255319		15.4616	-0.506656		15.8125	-0.912903		13.3749	-5.83869
13.3644	-0.102176		13.5094	-0.205319		15.1529	-0.456013		15.6213	-0.862901		12.9702	-5.78852
12.9467	-0.052168		13.112	-0.155319		14.8168	-0.40537		15.4425	-0.812899		12.5714	-5.73835
12.5342	-0.002168		12.7189	-0.105303		14.4056	-0.355365		15.2771	-0.762897		12.1798	-5.68815
12.1276	0.047832		12.3229	-0.055287		13.9996	-0.30536		15.1247	-0.712895		11.7954	-5.63795
11.7274	0.097834		11.9202	-0.005287		13.5982	-0.255356		14.9383	-0.662245		11.4184	-5.58778
11.3335	0.147837		11.5241	0.044713		13.2028	-0.205353		14.7274	-0.611594		11.0499	-5.53761
10.9474	0.197839		11.1349	0.094714		12.8154	-0.155348		14.3492	-0.560192		10.6927	-5.48742
10.5694	0.247841		10.7532	0.144715		12.4349	-0.105343		13.9785	-0.50879		10.3441	-5.43724
10.2014	0.297841		10.3805	0.194716		12.0616	-0.055335		13.5424	-0.458061		10.0072	-5.38705
9.84316	0.347841		10.0168	0.244716		11.6959	-0.005327		13.1108	-0.407333		9.6806	-5.33687
9.49499	0.397842		9.66341	0.294716		11.3354	0.044678		12.6623	-0.357327		9.36907	-5.28669
9.15873	0.447844		9.32145	0.344717		10.9836	0.094682		12.2163	-0.307321		9.07153	-5.23651
8.83725	0.497844		8.99278	0.394718		10.604	0.144821		11.775	-0.257317		8.78799	-5.18634
8.52769	0.547844		8.67787	0.444719		10.232	0.194959		11.3379	-0.207313		8.52114	-5.13617
8.23609	0.597846		8.37705	0.494721		9.8422	0.244967		10.901	-0.157253		8.27598	-5.08596
7.95991	0.647848		8.09241	0.544724		9.46128	0.294974		10.4683	-0.107194		8.04834	-5.03575
7.70348	0.697849		7.827	0.594724		9.08976	0.344984		10.0398	-0.057026		7.84166	-4.98558
7.46607	0.747849		7.58055	0.644724		8.72841	0.394994		9.61727	-0.006858		7.65659	-4.9354
7.25109	0.79785		7.35469	0.694727		8.38024	0.445		9.20156	0.043214		7.49489	-4.88522
7.05954	0.847851		7.15148	0.744729		8.04535	0.495005		8.79104	0.093287		7.35799	-4.83504
6.88987	0.897861		6.97302	0.794729		7.7241	0.545025		8.38353	0.143381		7.24794	-4.78485
6.74547	0.947872		6.82035	0.84473		7.41883	0.595044		7.98312	0.193475		7.16481	-4.73466
6.54885	0.998548		6.69469	0.89473		7.13413	0.645048		7.5876	0.243481		7.10861	-4.68447
6.37812	1.04923		6.59747	0.94473		6.8684	0.695051		7.20137	0.293486		7.08005	-4.63427
6.19475	1.09929		6.27214	0.994849		6.62399	0.745059		6.80177	0.343542		6.97217	-4.58335
6.03863	1.14935		5.94519	1.04497		6.4023	0.795067		6.40675	0.393598		6.88836	-4.53243
5.74285	1.19938		5.61624	1.09497		6.20693	0.845075		6.01163	0.44387		6.69935	-4.4784
5.46997	1.2494		5.30635	1.14497		6.03918	0.895083		5.62944	0.494142		6.5131	-4.42437
5.21794	1.2994		5.02002	1.19497		5.90094	0.94509		5.24722	0.544159		6.29603	-4.37159
4.99405	1.34941		4.75995	1.24497		5.79327	0.995097		4.88048	0.594175		6.10798	-4.31882
4.79974	1.39941		4.52829	1.29497		5.71734	1.0451		4.52717	0.644278		5.85173	-4.26858
4.63927	1.44941		4.3295	1.34497		5.67483	1.09511		4.19478	0.694381		5.62038	-4.21835
4.48923	1.49964		4.16767	1.39497		5.61957	1.14542		3.88666	0.744465		5.40779	-4.16833
4.37088	1.54988		4.04529	1.44497		5.43344	1.19574		3.60718	0.794548		5.22424	-4.11831
4.2619	1.59992		3.96644	1.49497		5.12139	1.24578		3.36131	0.844665		5.0721	-4.06828
4.19263	1.64997		3.92987	1.54497		4.833	1.29583		3.15369	0.894781		4.95253	-4.01826
4.15681	1.69997		3.93815	1.59497		4.56997	1.34585		2.98866	0.944842		4.86903	-3.96823
4.16321	1.74998		3.99092	1.64497		4.33727	1.39588		2.86802	0.994903		4.82209	-3.91821
4.21337	1.79999		4.08302	1.69499		4.13956	1.44591		2.7918	1.04495		4.81165	-3.86818
4.30353	1.85		4.21339	1.745		3.97899	1.49594		2.76842	1.095		4.83872	-3.81815
4.43244	1.90001		4.32952	1.79593		3.85777	1.54596		2.79205	1.14501		4.8241	-3.76718
4.59824	1.95001		4.48187	1.84686		3.78009	1.59598		2.86795	1.19501		4.84281	-3.7162
4.7752	2.00008		4.59428	1.89729		3.74697	1.64599		2.89379	1.24513		4.86644	-3.66456
4.62927	2.05014		4.74128	1.94772		3.75939	1.696		2.96809	1.29525		4.92928	-3.61292
4.31005	2.10015		4.42668	1.99823		3.81792	1.74601		3.05259	1.34533		4.91626	-3.56197
4.01497	2.15016		4.13782	2.04874		3.92036	1.79602		3.18443	1.39542		4.93961	-3.51102
3.74902	2.20016		3.85962	2.09875		4.06619	1.84603		3.35278	1.44547		4.86919	-3.45223
3.51784	2.25017		3.6134	2.14875		4.2504	1.89604		3.54415	1.49553		4.72475	-3.39343
3.32715	2.30017		3.40458	2.19876		4.03908	1.94761		3.27826	1.54601		4.376	-3.34341
3.17974	2.35018		3.23719	2.24876		3.76417	1.99919		3.0512	1.59649		4.04911	-3.29338
3.08143	2.40019		3.11931	2.29877		3.48231	2.04921		2.84371	1.64652		3.74199	-3.2433
3.03473	2.45019		3.05195	2.34878		3.23554	2.09923		2.68411	1.69656		3.46439	-3.19322
3.04144	2.5002		3.0372	2.39879		3.02972	2.14924		2.57996	1.74659		3.22078	-3.14309
3.10006	2.5502		3.07547	2.44879		2.8701	2.19925		2.53193	1.79661		3.01678	-3.09295
3.20808	2.60021		3.16435	2.4988		2.76132	2.24926		2.5414	1.84665		2.859	-3.04285
3.1017	2.65021		3.30224	2.5488		2.70757	2.29927		2.61004	1.89669		2.74741	-2.99274
2.75952	2.70021		3.33782	2.59922		2.71107	2.34929		2.7357	1.94676		2.69159	-2.94262
2.44836	2.75021		3.1467	2.64963		2.77099	2.3993		2.91312	1.99682		2.69073	-2.8925
2.17553	2.80021		2.78573	2.69964		2.88549	2.44931		3.09203	2.04719		2.73832	-2.84244
1.94905	2.85022		2.45248	2.74965		3.05067	2.49932		3.31575	2.09757		2.83851	-2.79237
1.77686	2.90022		2.15432	2.79966		3.23941	2.54948		3.50731	2.14783		2.98982	-2.74229
1.66766	2.95023		1.89824	2.84966		3.3685	2.59965		3.7351	2.1981		3.18659	-2.69221
1.62993	3.00023		1.6972	2.89968		3.00424	2.64967		3.6556	2.24834		3.22749	-2.6385
1.66301	3.05023		1.55619	2.94969		2.66609	2.6997		3.61874	2.29858		3.32412	-2.58478
1.76482	3.10023		1.48527	2.9997		2.36268	2.74974		3.59252	2.34858		3.21022	-2.53465
1.93007	3.15023		1.48858	3.04971		2.09773	2.79978		3.61301	2.39859		3.14388	-2.48452
2.15233	3.20024		1.5667	3.09971		1.88097	2.84981		3.67944	2.44859		3.0874	-2.43441
2.42182	3.25025		1.71396	3.14972		1.7216	2.89984		3.79065	2.49859		3.08145	-2.3843
2.68595	3.30058		1.91944	3.19975		1.62821	2.94987		3.90453	2.54887		3.10168	-2.33424
2.98179	3.35092		2.17693	3.24979		1.605	2.9999		3.96489	2.59914		3.10963	-2.28417
3.13869	3.40094		2.4735	3.29979		1.65338	3.04993		3.82913	2.64914		3.09173	-2.23409
3.33924	3.45096		2.80503	3.3498		1.7709	3.09996		3.735	2.69915		3.12444	-2.18401
3.36244	3.50121		3.15881	3.39983		1.95133	3.14998		3.64515	2.74973		3.1994	-2.13376
3.37097	3.55145		3.50107	3.44986		2.18556	3.2		3.59886	2.80031		3.32197	-2.08351
3.37671	3.60147		3.48634	3.49987		2.46678	3.25004		3.44905	2.85032		3.29131	-2.03326
3.42902	3.65148		3.51817	3.54987		2.78511	3.30008		3.33773	2.90033		3.3039	-1.983
3.47817	3.7019		3.55309	3.60018		3.07955	3.35119		3.2717	2.95033		3.32728	-1.93287
3.2514	3.75232		3.40217	3.65049		3.24626	3.4023		3.25402	3.00033		3.39622	-1.88274
2.88754	3.80237		3.03653	3.7005		3.26433	3.45233		3.28562	3.05033		3.51099	-1.83261
2.52591	3.85242		2.69656	3.7505		3.33087	3.50236		3.36519	3.10033		3.66793	-1.78248
2.13538	3.90242		2.36424	3.80058		3.40072	3.5526		3.49056	3.15033		3.85315	-1.73246
1.77185	3.95242		2.02842	3.85066		3.08153	3.60284		3.65672	3.20033		4.07401	-1.68245
1.44416	4.00242		1.68688	3.90069		2.72864	3.65285		3.8644	3.25033		4.2705	-1.63222
1.16416	4.05242		1.38645	3.95073		2.36174	3.70286		4.10466	3.30034		4.49775	-1.58198
0.94621	4.10242		1.14136	4.00075		2.00098	3.75293		4.37756	3.35034		4.67885	-1.53077
0.80565	4.15242		0.96458	4.05077		1.67458	3.803		4.67741	3.40034		4.89239	-1.47955
0.73931	4.20243		0.86828	4.1008		1.39728	3.85311		4.96178	3.45065		4.86898	-1.39747
0.76019	4.25244		0.86208	4.15083		1.17596	3.90322		5.06845	3.50095		4.94687	-1.31539
0.63096	4.30245		0.92195	4.20086		1.0251	3.9533		5.06244	3.55096		4.83486	-1.26494
0.59817	4.35247		1.03298	4.25089		0.95651	4.00339		5.09212	3.60097		4.76012	-1.21449
0.66586	4.40251		1.05022	4.30092		0.96656	4.05339		5.15692	3.65099		4.72427	-1.16401
0.82601	4.45254		1.15185	4.35094		1.06182	4.10339		5.25618	3.701		4.72673	-1.11354
1.06589	4.50256		1.32976	4.40097		1.02776	4.1534		5.38952	3.75101		4.76651	-1.06315
1.36622	4.55257		1.57215	4.45099		1.07593	4.20341		5.5543	3.80102		4.84467	-1.01276
1.65746	4.603		1.81074	4.50148		1.19762	4.25349		5.73515	3.85119		4.96113	-0.962332
1.87034	4.65343		1.94414	4.55197		1.39291	4.30356		5.77673	3.90136		5.11138	-0.91191
1.72696	4.70344		1.72339	4.602		1.63144	4.35365		5.68125	3.95137		5.29559	-0.861464
1.65382	4.75345		1.56098	4.65202		1.91959	4.40375		5.61626	4.00138		5.51067	-0.811018
1.65577	4.80346		1.47159	4.70206		1.66413	4.45486		5.58558	4.05138		5.75423	-0.760609
1.7299	4.85347		1.45687	4.7521		1.46913	4.50598		5.58832	4.10139		6.02322	-0.710201
1.87463	4.90348		1.52049	4.80213		1.29392	4.55605		5.6239	4.1514		6.3134	-0.659767
2.07968	4.95348		1.6557	4.85215		1.19441	4.60613		5.69241	4.20141		6.62416	-0.609333
2.33689	5.00349		1.85765	4.90219		1.17647	4.65618		5.79523	4.25142		6.87557	-0.557449
2.63637	5.0535		2.11292	4.95223		1.24332	4.70624		5.92561	4.30142		7.15001	-0.505565
2.97069	5.1035		2.41211	5.00226		1.3898	4.7563		6.05135	4.35161		7.4445	-0.453689
3.33284	5.15351		2.7472	5.05229		1.60527	4.80635		6.06244	4.40181		7.7582	-0.401813
3.71726	5.20352		3.11345	5.10231		1.87827	4.85643		6.03131	4.45181		8.04733	-0.343929
4.11857	5.25353		3.4966	5.15232		2.19585	4.9065		6.03093	4.50182		8.36137	-0.286045
4.53455	5.30354		3.89841	5.20233		2.54851	4.95657		6.06332	4.55182		8.31741	-0.233591
4.96163	5.35355		4.31485	5.25235		2.92702	5.00663		6.1256	4.60182		8.20482	-0.181136
5.39907	5.40356		4.74276	5.30236		3.32888	5.05671		6.21767	4.65183		7.89322	-0.131056
5.84435	5.45357		5.18019	5.35236		3.74451	5.10679		6.33794	4.70184		7.59825	-0.080976
6.29574	5.50358		5.62258	5.40239		4.17537	5.15684		6.49114	4.75185		7.32084	-0.0309
6.75247	5.55358		6.07181	5.45241		4.61577	5.2069		6.67096	4.80185		7.06326	0.019176
7.21354	5.60359		6.42345	5.50488		4.96928	5.25777		6.8131	4.85187		6.82793	0.06924
7.67859	5.65359		6.7925	5.55736		5.28918	5.30864		6.97952	4.9019		6.61517	0.119305
8.14605	5.70359		7.09794	5.60736		5.55091	5.35865		7.16424	4.95191		6.43009	0.169388
8.61654	5.75359		7.42049	5.65736		5.83661	5.40866		7.37113	5.00191		6.27061	0.21947
9.05138	5.80413		7.75969	5.70736		6.14433	5.45867		7.60167	5.05192		6.14126	0.269545
9.22922	5.85467		8.11149	5.75737		6.47081	5.50868		7.85244	5.10193		6.0416	0.31962
9.0809	5.90467		8.477	5.80736		6.81366	5.55869		8.10675	5.15199		5.93496	0.37063
8.9539	5.95467		8.85248	5.85737		7.17139	5.6087		8.23905	5.20205		5.82946	0.42164
8.84853	6.00468		9.16488	5.90841		7.54249	5.65872		8.30098	5.25206		5.63631	0.471786
8.76584	6.05468		9.15597	5.95944		7.92473	5.70873		8.38696	5.30207		5.47329	0.521933
8.70682	6.10468		9.08087	6.00945		8.27586	5.75879		8.49463	5.35207		5.34268	0.572057
8.67149	6.15468		9.0267	6.05945		8.62352	5.80885		8.62464	5.40208		5.24481	0.622181
8.59507	6.20632		8.9953	6.10945		8.88123	5.85949		8.77007	5.45208		5.16261	0.672394
8.5017	6.25796		8.98712	6.15945		8.87026	5.91013		8.87708	5.50208		5.11544	0.722607
8.28481	6.30799		9.00322	6.20946		8.81529	5.96014		8.76543	5.55209		4.87951	0.772617
8.08859	6.35802		9.04121	6.25947		8.78327	6.01016		8.67605	5.60209		4.6669	0.822627
7.9152	6.40804		9.05761	6.30966		8.72689	6.06088		8.61145	5.65209		4.4107	0.872716
7.76498	6.45806		8.92595	6.35986		8.66524	6.11161		8.57094	5.7021		4.18439	0.922805
7.63993	6.50808		8.76398	6.40991		8.43245	6.16163		8.55398	5.7521		3.98423	0.972817
7.53762	6.5581		8.62364	6.45995		8.21933	6.21164		8.5609	5.8021		3.82088	1.02283
7.46346	6.60812		8.50534	6.51		8.02876	6.26166		8.57256	5.85215		3.67835	1.07341
7.4142	6.65815		8.41036	6.56006		7.85995	6.31167		8.60864	5.90219		3.57937	1.12399
7.38931	6.70819		8.34132	6.61009		7.71453	6.36168		8.37207	5.95226		3.29002	1.17488
7.39163	6.75824		8.29676	6.66012		7.59312	6.41169		8.15077	6.00233		3.03584	1.22578
7.42192	6.80828		8.27493	6.71017		7.49627	6.46171		7.9374	6.05233		2.78184	1.27678
7.47928	6.85832		8.27807	6.76022		7.4257	6.51173		7.74355	6.10234		2.57257	1.32779
7.56257	6.90837		8.2987	6.81023		7.38488	6.56173		7.57428	6.15235		2.39882	1.37804
7.6717	6.95842		8.34352	6.86025		7.3707	6.61174		7.42868	6.20235		2.282	1.42829
7.80588	7.00846		8.41048	6.91028		7.38215	6.66176		7.30657	6.25235		2.18156	1.47886
7.96367	7.05851		8.50145	6.9603		7.42028	6.71178		7.21069	6.30235		2.14317	1.52943
8.14525	7.10855		8.61589	7.01033		7.48789	6.76179		7.14576	6.35237		2.15445	1.5797
8.34838	7.1586		8.75269	7.06036		7.58119	6.8118		7.10371	6.40238		2.23137	1.62998
8.37932	7.20993		8.67415	7.1129		7.69886	6.86181		7.0939	6.45238		2.36492	1.6803
8.2773	7.26126		8.51901	7.16545		7.84114	6.91183		7.11203	6.50238		2.5538	1.73062
8.09115	7.31126		8.32304	7.21546		8.00619	6.96185		7.15647	6.55239		2.7256	1.78112
7.92708	7.36126		8.14848	7.26547		8.19359	7.01187		7.22859	6.60239		2.65121	1.83162
7.78784	7.41126		7.99588	7.31548		8.21832	7.06229		7.32716	6.6524		2.60261	1.88163
7.67237	7.46127		7.86714	7.36549		8.06686	7.11271		7.45189	6.70241		2.61251	1.93163
7.58307	7.51127		7.75675	7.41554		7.87473	7.16272		7.50227	6.7539		2.67739	1.98164
7.51984	7.56127		7.67156	7.46559		7.7044	7.21273		7.58083	6.80539		2.79617	2.03165
7.48473	7.61127		7.60447	7.51577		7.55808	7.26274		7.6054	6.85881		2.86789	2.08281
7.47509	7.66127		7.56368	7.56594		7.43696	7.31275		7.65681	6.91223		2.98997	2.13397
7.49381	7.71127		7.53691	7.61615		7.34155	7.36276		7.55745	6.96232		3.07356	2.18398
7.53793	7.76128		7.53696	7.66636		7.27211	7.41276		7.48422	7.01241		3.20549	2.234
7.56473	7.81128		7.55455	7.7166		7.23248	7.46277		7.36946	7.06358		3.38213	2.28403
7.61768	7.86129		7.59518	7.76684		7.21977	7.51279		7.28093	7.11475		3.59831	2.33405
7.69398	7.91129		7.63563	7.81732		7.2361	7.5628		7.20463	7.16624		3.85114	2.38407
7.79563	7.96129		7.70319	7.8678		7.28009	7.6128		7.15771	7.21773		4.13515	2.43408
7.92035	8.0113		7.76436	7.9179		7.35151	7.66281		7.0416	7.2682		4.37609	2.48466
8.06627	8.0613		7.84095	7.968		7.44954	7.71282		6.95358	7.31867		4.64751	2.53525
8.20127	8.11136		7.92431	8.01802		7.5737	7.76283		6.86293	7.36868		4.62148	2.59211
8.35914	8.16141		8.03282	8.06803		7.72293	7.81284		6.80096	7.4187		4.6199	2.64898
8.51905	8.21141		8.16489	8.11805		7.89359	7.86285		6.76895	7.46871		4.3996	2.69923
8.70052	8.26141		8.31921	8.16806		8.08682	7.91286		6.76657	7.51872		4.21304	2.74948
8.904	8.31141		8.49795	8.21808		8.26376	7.96326		6.75275	7.56888		4.0356	2.79951
9.12685	8.36141		8.6968	8.26809		8.45579	8.01365		6.76287	7.61904		3.89623	2.84953
9.31984	8.4125		8.91519	8.3181		8.63788	8.06374		6.73418	7.66906		3.80065	2.89966
9.36103	8.46359		9.15194	8.36812		8.83961	8.11383		6.73529	7.71907		3.74849	2.94978
9.06377	8.51359		9.18981	8.4217		9.03395	8.16386		6.7639	7.76908		3.74049	2.99986
8.78123	8.56358		8.9412	8.47528		9.24613	8.21389		6.82184	7.8191		3.77664	3.04992
8.51553	8.61359		8.61172	8.52583		9.41686	8.2666		6.90757	7.86911		3.85566	3.09996
8.26757	8.66359		8.2964	8.57639		9.22632	8.31931		7.02126	7.91911		3.97673	3.15
8.03795	8.71359		7.96852	8.62807		8.83766	8.36933		7.16247	7.96912		4.13868	3.20009
7.82873	8.76359		7.65745	8.67976		8.45881	8.41935		7.32841	8.01914		4.33705	3.25019
7.64281	8.81359		7.34606	8.73017		8.09284	8.46937		7.51936	8.06915		4.53395	3.30077
7.48	8.86359		7.05245	8.78058		7.73598	8.51938		7.7331	8.11916		4.65469	3.35134
7.34086	8.91359		6.7579	8.83063		7.39378	8.56939		7.96811	8.16916		4.59512	3.41346
7.22602	8.96359		6.48292	8.88068		7.06685	8.6194		8.22196	8.21917		4.59289	3.47557
7.13966	9.0136		6.23161	8.93074		6.75909	8.66944		8.49653	8.26918		4.50854	3.52573
7.07751	9.0636		6.00483	8.9808		6.47052	8.71948		8.78664	8.31919		4.46081	3.57589
6.97985	9.11386		5.80537	9.03087		6.2018	8.7695		9.09141	8.3692		4.36796	3.62848
6.81472	9.16411		5.63212	9.08093		5.95645	8.81953		9.41041	8.41921		4.3187	3.68107
6.64654	9.21441		5.49251	9.13099		5.7367	8.86955		9.74356	8.46922		4.24253	3.73373
6.50517	9.2647		5.38581	9.18104		5.54499	8.91957		10.0884	8.51923		4.21129	3.78638
6.39218	9.31498		5.3125	9.23109		5.38337	8.96959		10.387	8.57002		4.18247	3.83697
6.30854	9.36526		5.27428	9.28115		5.25427	9.0196		10.4888	8.62081		4.19517	3.88756
6.25441	9.41553		5.25961	9.33143		5.08964	9.0696		10.2708	8.67082		4.22774	3.93765
6.23125	9.46581		5.28044	9.38171		4.95637	9.11961		10.0691	8.72082		4.30106	3.98774
6.19601	9.51581		5.31192	9.4334		4.84197	9.16963		9.8842	8.77083		4.33859	4.03963
6.19239	9.56581		5.38097	9.48508		4.76465	9.21966		9.7181	8.82083		4.41786	4.09152
6.08131	9.61761		5.31662	9.54691		4.72686	9.26968		9.57573	8.87084		4.53047	4.14405
6.00264	9.6694		5.30684	9.60874		4.72537	9.3197		9.45057	8.92085		4.68248	4.19658
5.91551	9.72327		5.20671	9.66848		4.76339	9.36971		9.34884	8.97086		4.76915	4.24921
5.8626	9.77713		5.15773	9.72823		4.83983	9.41972		9.26718	9.02086		4.89588	4.30183
5.78332	9.82714		5.01163	9.78056		4.95264	9.46973		9.2089	9.07087		5.05484	4.35461
5.73639	9.87714		4.9017	9.83289		5.10017	9.51973		9.17152	9.12088		5.24813	4.40739
5.72067	9.92715		4.73818	9.88714		5.28224	9.56975		9.16095	9.17089		5.27331	4.46292
5.73839	9.97716		4.61683	9.94139		5.4938	9.61976		9.17084	9.22089		5.30214	4.51845
5.79131	10.0272		4.52914	9.99775		5.73349	9.66977		9.19098	9.27092		5.0825	4.56877
5.8764	10.0772		4.49137	10.0541		5.99752	9.71978		9.21846	9.32095		4.89194	4.61909
5.99251	10.1272		4.31059	10.1151		6.26908	9.76992		9.18734	9.37096		4.73855	4.66937
6.13837	10.1772		4.13941	10.1761		6.34094	9.82007		9.17786	9.42098		4.61937	4.71965
6.31175	10.2272		3.63287	10.312		6.34813	9.87008		9.19327	9.47098		4.53901	4.76996
6.51181	10.2772		3.4349	10.4478		6.38559	9.92009		9.23124	9.52099		4.49771	4.82026
6.73806	10.3272		3.32385	10.553		6.45435	9.97009		9.29055	9.571		4.49944	4.87053
6.98575	10.3772		3.42685	10.6581		6.55234	10.0201		9.3716	9.62101		4.54211	4.9208
7.24763	10.4272		3.26974	10.7086		6.67724	10.0701		9.47404	9.67102		4.62336	4.97106
7.52737	10.4773		3.15967	10.759		6.82915	10.1201		9.59744	9.72103		4.74321	5.02133
7.74387	10.5282		3.06024	10.8106		7.01077	10.1701		9.74245	9.77103		4.89798	5.07163
7.98147	10.5792		3.01503	10.8622		7.21463	10.2201		9.9063	9.82104		5.08608	5.12193
8.14946	10.6292		2.87368	10.9215		7.44107	10.2701		10.0893	9.87105		5.30839	5.17215
8.3387	10.6792		2.80398	10.9808		7.68684	10.3201		10.2883	9.92106		5.55773	5.22237
8.54811	10.7292		2.70666	11.0564		7.95614	10.3701		10.506	9.97107		5.83308	5.27259
8.77677	10.7792		2.73574	11.132		8.24106	10.4201		10.7398	10.0211		6.13006	5.32282
9.02667	10.8292		2.79627	11.2015		8.54251	10.4701		10.9882	10.0711		6.44803	5.37305
9.28926	10.8792		2.96144	11.2711		8.85893	10.5201		11.2503	10.1211		6.78238	5.42328
9.57117	10.9292		3.1593	11.5902		9.14806	10.5713		11.528	10.1711		7.12617	5.4734
9.86777	10.9792		5.02726	11.9093		9.45012	10.6225		11.8168	10.2211		7.48453	5.52351
10.168	11.0293		5.98986	12.0903		9.67207	10.6728		12.1179	10.2711		7.55882	5.58871
10.4813	11.0793		7.22028	12.2713		9.91053	10.723		12.4302	10.3211		7.67731	5.6539
10.7876	11.1301		7.54427	12.3217		10.1559	10.773		12.7532	10.3711		7.49054	5.7039
11.1067	11.1808		7.88352	12.372		10.4152	10.823		13.086	10.4211		7.32602	5.7539
11.4346	11.2311		8.18484	12.4292		10.6623	10.8735		13.4273	10.4712		7.18775	5.80391
11.7733	11.2814		8.50899	12.4863		10.9241	10.924		13.7772	10.5212		7.07418	5.85391
12.1217	11.3317		8.85403	12.5437		11.1996	10.9745		14.1361	10.5712		6.9905	5.90391
12.4794	11.3819		9.21805	12.601		11.4886	11.025		14.5019	10.6212		6.93517	5.95391
12.8177	11.4319		9.59903	12.6583		11.7891	11.0753		14.8739	10.6712		6.9092	6.00391
13.1649	11.4819		9.99569	12.7156		12.1016	11.1256		15.2523	10.7212		6.91041	6.05392
13.518	11.5319		10.4098	12.9684		12.4041	11.1756		15.6379	10.7712		6.94259	6.10392
13.8791	11.5819		11.3129	13.2213		12.7174	11.2256		16.029	10.8212		7.00359	6.15392
14.2479	11.6319		11.8493	13.2835		13.0411	11.2756		16.4253	10.8712		7.09301	6.20392
14.6237	11.6819		12.3909	13.3456		13.3741	11.3256		16.8256	10.9212		7.20801	6.25392
15.0069	11.7319		12.8078	13.396		13.7164	11.3757		17.2319	10.9712		7.35051	6.30392
15.3954	11.7819		13.23	13.4465		14.0671	11.4257		17.6426	11.0212		7.51811	6.35392
15.7891	11.8319		13.6137	13.5051		14.4271	11.4757		18.0565	11.0713		7.58846	6.40641
16.1879	11.8819		14.0097	13.5638		14.7935	11.5257		18.4744	11.1213		7.68685	6.4589
16.5932	11.9319		14.389	13.6247		15.1665	11.5757		18.8966	11.1713		7.62507	6.51116
17.0031	11.9819		14.7819	13.6855		15.5458	11.6257		19.3221	11.2213		7.59197	6.56342
17.4164	12.0319		15.1736	13.7465		15.9318	11.6757					7.49801	6.61361
17.8331	12.0819		15.5778	13.8075		16.3234	11.7257					7.43057	6.6638
18.2549	12.1319		15.9942	13.8681		16.7194	11.7757					7.39512	6.71407
18.6803	12.182		16.4213	13.9287		17.1198	11.8257					7.38551	6.76434
19.1085	12.232		16.8575	13.9894		17.5265	11.8757					7.40221	6.81455
19.5397	12.282		17.3029	14.0502		17.9376	11.9257					7.4461	6.86477
			17.762	14.19		18.3525	11.9757					7.43656	6.91599
			18.3078	14.3299		18.7707	12.0257					7.45446	6.96722
			18.9498	14.5153		19.1926	12.0758					7.46049	7.01786
			19.7295	14.7007		19.6179	12.1258					7.49321	7.0685
												7.52029	7.11857
												7.57293	7.16865
												7.65344	7.21874
												7.75939	7.26884
												7.86962	7.31976
												8.00491	7.37068
												8.04812	7.42207
												8.11611	7.47346
												8.0063	7.52445
												7.92171	7.57545
												7.78315	7.62923
												7.67098	7.68301
												7.58603	7.73639
												7.53137	7.78977
												7.50338	7.84268
												7.50592	7.89558
												7.53791	7.94853
												7.60015	8.00148
												7.58561	8.05158
												7.57894	8.10169
												7.49379	8.15389
												7.43788	8.2061
												7.40859	8.25678
												7.40643	8.30746
												7.40613	8.3613
												7.43751	8.41514
												7.46677	8.47125
												7.53002	8.52736
												7.62332	8.58364
												7.74527	8.63991
												7.78896	8.6914
												7.86013	8.74288
												7.9583	8.79437
												8.08274	8.84585
												8.13074	8.89618
												8.20365	8.94652
												8.22313	9.00938
												8.28079	9.07225
												8.26132	9.1415
												8.28799	9.21075
												8.28318	9.27472
												8.27366	9.33869
												8.18427	9.39227
												8.12174	9.44586
												8.072	9.49961
												8.04972	9.55336
												7.96494	9.60337
												7.9022	9.65338
												7.79213	9.70471
												7.70851	9.75604
												7.65083	9.80733
												7.62039	9.85862
												7.61998	9.90995
												7.64766	9.96128
												7.70273	10.0126
												7.78444	10.0639
												7.76165	10.1183
												7.76784	10.1728
												7.77001	10.2296
												7.8055	10.2864
												7.85602	10.3916
												8.01454	10.4968
												8.1572	10.5511
												8.32731	10.6053
												8.26332	10.6553
												8.21046	10.7054
												8.1245	10.7555
												8.06316	10.8056
												8.00279	10.8556
												7.96757	10.9056
												7.95712	10.9556
												7.97049	11.0056
												8.01343	11.0557
												8.07962	11.1057
												8.17055	11.1557
												8.28538	11.2057
												8.42409	11.2557
												8.58436	11.3058
												8.76556	11.3558
												8.96679	11.4058
												9.1004	11.4574
												9.25424	11.509
												9.13045	11.6059
												9.092	11.7028
												9.06533	11.7734
												9.08396	11.844
												8.99819	11.9009
												8.94183	11.9578
												8.91121	12.0152
												8.91111	12.0725
												8.9121	12.1298
												8.94187	12.187
												8.91107	12.2433
												8.9101	12.2995
												8.93378	12.3565
												8.98801	12.4135
												9.07143	12.4712
												9.18488	12.5288
												9.29601	12.5831
												9.42871	12.6374
												9.52121	12.6929
												9.63956	12.7484
												9.71767	12.8105
												9.82246	12.8726
												9.94554	12.936
												10.1016	12.9994
												10.2879	13.0627
												10.5043	13.126
												10.7506	13.1893
												11.0231	13.2526
												11.3207	13.3159
												11.6417	13.3791
												11.9816	13.4424
												12.3417	13.5057
												12.7078	13.5698
												13.0926	13.634
												13.4933	13.699
												13.9107	13.764
												14.328	13.859
												14.7893	13.9539
												15.3103	14.0744
												15.8984	14.195
												16.7137	14.3881
												17.6874	14.5812
												18.2917	14.6493
												18.8988	14.7173
												19.3205	14.9079
												19.9004	15.0984
