# Supplementary material for: Modulation of the Erwinia ligand-gated ion channel (ELIC) and the 5-HT3 receptor via a common vestibule site
Source: eLife. 2020 Jan 28;9:e51511. doi: 10.7554/eLife.51511 (PMC7015668; doi:10.7554/eLife.51511)
Supplement: Figure 4—source data 1. [file elife-51511-fig4-data1.xlsx]

## Sheet: Figure4-source data1
		K149C
	before MTSEA-biotin								after MTSEA-biotin
0.1													0.002039	0.008923	0.000922
0.3	0	-0.00452	0.000344	0.003071	0.003442	0.001743	0.001583		0.014523	0.015713	0.002843	0.196674	0.003154	0.03882	0.001593
1	0.004783	0.006746	0.003176	0.003408	0.006944	0.007197	0.002624		0.198761	0.048332	0.062554	0.680288	0.044348	0.315037	0.038195
3	0.278259	0.17198	0.22407	0.200682	0.171269	0.236058	0.088139		0.769971	0.440295	0.538557	1.17177	0.418975	0.685724	0.391672
10	0.770496	0.911398	0.856172	0.619836	0.520349	0.716767	0.527091		0.860359	0.760109	0.711172	1.28724	0.821395	0.681648	0.722421
30	0.858616	1.29176	0.922219	0.795835	0.763882	0.906711	0.83411			0.978693	0.736862	1.35747	0.886594		0.891026
100	1	1	1	1	1	1	1
300
1000
		T112C
	before MTSEA-biotin								after MTSEA-biotin
0.1									0.000766	0.000845	0.000929	0.001285
0.3	0.002304	0.002242	0.000587	0.001239					0.000526	0.000952	0.001047	0.001773
1	0.003426	0.004503	0.00268	0.003086					0.014476	0.026041	0.010965	0.016063
3	0.139172	0.187926	0.114988	0.156357					0.480222	0.469299	0.376234	0.502544
10	0.694261	0.724826	0.609476	0.670438					0.842679	0.799345	0.732377	0.820891
30	0.857474	0.918046	0.858006	0.871714					0.938032	0.898364	0.860784	0.924613
100	1	1	1	1
300
1000
		L151C
	before MTSEA-biotin								after MTSEA-biotin
0.3											-0.0013	0.002368	-0.00035	0	0
1											0.007367	0.003721	0.002891	-0.00249	0
3	0.00852	0	-0.0171	-0.01481	-0.00975	0	-0.00985				0.182016	0.122735	0.073651	0.029987	0.015577
10	0.010688	0.015232	0.012825	0.010841	0.020063	0	0.00985				0.681848	0.627418	0.424776	0.321358	0.237088
30	0.126084	0.176458	0.161739	0.144104	0.218545	0.194084	0.154257				1	1	0.9149	0.927499	0.796726
100	0.450552	0.736711	0.493409	0.437599	0.519383	0.454565	0.451085						1	1	1
300	1	1	0.947275	0.906663	1.00431	0.913599	0.880634
1000			1	1	1	1	1
	Insensitive mutants			I/I +MB
	Y86C	P111C	F125C	N147C
	0.95	0.66	0.75	1.2
	0.94	0.78	0.69	1.03
	0.98	0.84	0.87	0.98
	0.97	0.76
